# Supplementary material
Source: publisher figshare collection journal article supplement (https://acs.figshare.com/ndownloader/files/4374256)
Supplement: Supplementary file 1 [file 4374256]

## **Supporting Information**

### **Natural reduction of hexavalent chromium revealed by Cr stable isotopes in an oxic, basalt-hosted aquifer**

Raddatz, A.L.; Johnson, T.M.; McLing, T.L.

#### **Index**

|                                          | <u>Pages</u> |
|------------------------------------------|--------------|
| Supplementary Text                       | 2-4          |
| Supplementary Table (S1)                 | 5-6          |
| References for Supplementary Information | 7            |

## Quantifying Isotopic Fractionation

The magnitude of isotope fractionation is rigorously described using an instantaneous fractionation factor,  $\alpha$ , defined by  $\alpha = R_{\text{react}}/R_{\text{prod}}$ , where  $R_{\text{prod}}$  and  $R_{\text{react}}$  are the  $^{53}\text{Cr}/^{52}\text{Cr}$  ratios for the reaction product flux and the reactant, respectively, at one instant in time. This fractionation factor is often conveniently expressed as  $\varepsilon = (\alpha - 1)$ , which is a very close approximation to the difference in  $\delta^{53}\text{Cr}$  between the reactant and the reaction product flux:  $\varepsilon \approx \delta^{53}\text{Cr}_{\text{reactant}} - \delta^{53}\text{Cr}_{\text{product}}$ .

We have chosen to define  $\alpha$  as reactant isotope ratio divided by product ratio (not vice versa) because this leads to positive  $\varepsilon$  values for normal kinetic isotope effects. Negative values can lead to cumbersome language (e.g., a stronger isotopic fractionation gives a lesser, or more negative,  $\varepsilon$  value). Our convention here follows that used for most carbon and sulfur isotope work over several decades.

## Experimental Methods

**Sample collection.** Sampling methods and descriptions of the multi-level monitoring wells are given in a recent U.S. Geological Survey report (1). Groundwater samples were filtered upon collection using 0.45  $\mu\text{m}$  filters. No preservatives were added. Samples were packed in ice for shipping to Urbana, IL, then stored at 4°C for up to three months prior to analysis.

**Isotope analysis.** Isotope analyses were completed using a double isotope spike technique used in previous Cr isotope studies (2-3). The double spike solution contains  $^{50}\text{Cr}$  and  $^{54}\text{Cr}$  with a calibrated  $^{50}\text{Cr}/^{54}\text{Cr}$  ratio. This solution is mixed with samples and allows for correction of isotopic fractionation that might occur during sample purification, and mass bias effects during mass spectrometry. A measured amount of double spike solution was added to an aliquot of each sample containing 500-1000 ng of Cr(VI). Each sample was then acidified with HCl to attain a pH between 3 and 5, then passed through a 2 mL bed of BioRad AG1-X8 anion exchange resin. The Cr(VI) adsorbed onto the resin, and cations and weak acid anions were eluted with 15 mL 0.2M HCl followed by 4 mL 2M HCl. The Cr(VI) was then reduced to Cr(III) on the resin by adding a mixture of 1 mL of 2M  $\text{HNO}_3$  and several

drops 30% H<sub>2</sub>O<sub>2</sub>. The Cr(III) was eluted with 6 mL of 2M HNO<sub>3</sub>, evaporated to dryness, and treated with several drops concentrated HNO<sub>3</sub> to decompose organic residues. The sample was then dissolved in 2% HNO<sub>3</sub> for mass spectrometry. Quartz distilled acids were used for all steps. The average measured mass of Cr in blank preparations was 1 ng, with a maximum of 4 ng.

Mass spectrometry was conducted on a Nu Instruments Multi-Collector Inductively Coupled Plasma Mass Spectrometer (MC-ICP-MS) at the University of Illinois at Urbana-Champaign following methods described by Schoenberg *et al.* (3). Analyses were completed using pseudo-high resolution mode to measure Cr isotope intensities without interference from resolvable polyatomic ions such as ArN, ArC, and ArO. Interferences caused by Fe, V, and Ti isotopes were measured and corrected for. A purified standard solution of known isotopic composition, NIST SRM 979, was measured after approximately every 10 samples. Results were normalized to the mean value of SRM 979 for each analysis day. External precision was  $\pm 0.14\%$ , defined as twice the root mean square difference for the 17 samples prepared and analyzed in duplicate (Table S1).

**Concentrations.** Preliminary Cr(VI) concentrations were measured colorimetrically using EPA method 7196A. HCl was added to an aliquot of each sample to achieve a pH of approximately 2. Absorbance was measured at 540 nm using a Thermo Genesis spectrophotometer and diphenyl carbazide indicator. Reproducibility was  $\pm 4$   $\mu\text{g/L}$ . These concentrations were used only to achieve optimal proportions of double spike and sample.

More precise and sensitive concentration determinations were obtained via isotope dilution, as part of the isotope ratio measurements. When the double spike was added to each sample, volumes of double spike and sample solutions were measured. Mass spectrometry yielded precise, mass bias-corrected  $^{54}\text{Cr}/^{52}\text{Cr}$  measurements that were used to determine concentrations via routine isotope dilution calculations (*e.g.*, 4).

**Mixing equation.**  $\delta^{53}\text{Cr}$  values of mixtures of water containing background Cr with contaminated water were calculated using

$$\delta_M = \frac{\delta_A C_A f_A + \delta_B C_B (1 - f_A)}{C_A f_A + C_B (1 - f_A)}$$

where  $\delta_M$  is the  $\delta^{53}\text{Cr}$  value of the mixture,  $\delta_A$  and  $\delta_B$  are the  $\delta^{53}\text{Cr}$  values of waters A and B,  $C_A$  and  $C_B$  are their concentrations, and  $f_A$  is the volume fraction of A in the mixture (4).

Table S1. Measured Cr(VI) concentrations and  $\delta^{53}\text{Cr}$  values.

| Sample Location                  | Date<br>Sampled | Cr(VI)                |                   | $\delta^{53}\text{Cr}$<br>(‰) | Sampling<br>Depth<br>(m) | Dissolved<br>O <sub>2</sub><br>(mg/L) |
|----------------------------------|-----------------|-----------------------|-------------------|-------------------------------|--------------------------|---------------------------------------|
|                                  |                 | Concentration (μg/L)  |                   |                               |                          |                                       |
|                                  |                 | Historical<br>Maximum | This<br>Study     |                               |                          |                                       |
| <b><i>Upgradient Wells</i></b>   |                 |                       |                   |                               |                          |                                       |
| TRA-1                            | 4/22/08         | 2 <sup>3</sup>        | 3.21              | 1.23‰                         | 183                      | --                                    |
| TRA-4                            | 4/22/08         | 2 <sup>3</sup>        | 3.89              | 1.13‰                         | 294                      | --                                    |
| " (duplicate)                    |                 |                       | 3.67              | 1.11‰                         |                          |                                       |
| USGS 006                         | 11/27/07        | <1 <sup>5</sup>       | 48.5 <sup>1</sup> | 0.94‰                         | 189                      | --                                    |
| " (duplicate)                    |                 |                       | 48.2 <sup>1</sup> | 1.04‰                         |                          |                                       |
| USGS 006 Resampled               | 10/30/08        |                       | 38.5 <sup>1</sup> | 1.13‰                         | 189                      | --                                    |
| USGS 015                         | 11/27/07        | 8 <sup>3</sup>        | 7.72              | 1.24‰                         | 186                      | --                                    |
| " (duplicate)                    |                 |                       | 7.71              | 1.24‰                         |                          |                                       |
| USGS 133, zone 1                 | 9/2/08          | --                    | 5.10              | 0.82‰                         | 227                      | 13.8 <sup>4</sup>                     |
| USGS 133, zone 2                 | 9/2/08          | --                    | 5.92              | 0.86‰                         | 209                      | 11.4 <sup>4</sup>                     |
| USGS 133, zone 3                 | 9/2/08          | --                    | 5.79              | 0.84‰                         | 173                      | 11.1 <sup>4</sup>                     |
| USGS 133, zone 4                 | 9/2/08          | --                    | 1.99              | 2.51‰                         | 143                      | 7.46 <sup>4</sup>                     |
| " (duplicate)                    |                 |                       | 1.93              | 2.40‰                         |                          |                                       |
| USGS 134, zone 1                 | 9/3/08          | --                    | 4.17              | 1.37‰                         | 261                      | 10.3 <sup>4</sup>                     |
| " (duplicate)                    |                 |                       | 4.39              | 1.41‰                         |                          |                                       |
| USGS 134, zone 2                 | 9/3/08          | --                    | 6.76              | 0.77‰                         | 246                      | 10.4 <sup>4</sup>                     |
| USGS 134, zone 3                 | 9/3/08          | --                    | 6.86              | 0.83‰                         | 215                      | 10.5 <sup>4</sup>                     |
| USGS 134, zone 4                 | 9/4/08          | --                    | 4.54              | 1.21‰                         | 196                      | 8.90 <sup>4</sup>                     |
| " (duplicate)                    |                 |                       | 4.47              | 1.27‰                         |                          |                                       |
| USGS 134, zone 5                 | 9/4/08          | --                    | 6.99              | 1.03‰                         | 176                      | 10.0 <sup>4</sup>                     |
| <b><i>Downgradient Wells</i></b> |                 |                       |                   |                               |                          |                                       |
| EBR 1                            | 4/24/08         | 3 <sup>3</sup>        | 7.05              | 0.73‰                         | 328                      | 6.6 <sup>5</sup>                      |
| M1SA (RWMC)                      | 11/27/07        | --                    | 30.0              | 1.41‰                         | 194                      | --                                    |
| " (duplicate)                    |                 |                       | 29.4              | 1.39‰                         |                          |                                       |
| Middle 2050a, zone 2             | 8/26/08         | --                    | 3.66              | 1.06‰                         | 304                      | 9.80 <sup>4</sup>                     |
| " (duplicate)                    |                 |                       | 3.63              | 1.04‰                         |                          |                                       |
| Middle 2050a, zone 3             | 8/26/08         | --                    | 8.60              | 0.95‰                         | 241                      | 7.79 <sup>4</sup>                     |
| Middle 2050a, zone 4             | 8/26/08         | --                    | 2.98              | 0.93‰                         | 196                      | 7.42 <sup>4</sup>                     |
| Middle 2050a, zone 5             | 8/26/08         | --                    | 8.80              | 0.63‰                         | 157                      | 7.60 <sup>4</sup>                     |
| Middle 2051, zone 1              | 8/21/08         | --                    | 7.06              | 0.71‰                         | 348                      | 10.7 <sup>4</sup>                     |
| Middle 2051, zone 2              | 8/21/08         | --                    | 7.49              | 0.66‰                         | 333                      | 9.31 <sup>4</sup>                     |
| Middle 2051, zone 3              | 8/21/08         | --                    | 8.68              | 0.67‰                         | 252                      | 10.3 <sup>4</sup>                     |
| Middle 2051, zone 4              | 8/21/08         | --                    | 7.90              | 0.58‰                         | 229                      | 9.80 <sup>4</sup>                     |
| Middle 2051, zone 5              | 8/25/08         | --                    | 1.10              | 0.59‰                         | 184                      | 7.55 <sup>4</sup>                     |
| Middle 2051 zone 6               | 8/25/08         | --                    | 1.99              | 2.65‰                         | 178                      | --                                    |
| " (duplicate)                    |                 |                       | 1.81              | 2.58‰                         |                          |                                       |
| USGS 034                         | 4/17/08         | 28 <sup>5</sup>       | 33.7              | 0.31‰                         | 213                      | --                                    |
| USGS 036                         | 4/17/08         | 16 <sup>5</sup>       | 27.7              | 0.47‰                         | 173                      | --                                    |
| USGS 038                         | 4/17/08         | 10 <sup>5</sup>       | 19.6              | 0.78‰                         | 187                      | --                                    |
| USGS 058                         | 4/29/08         | 29 <sup>5</sup>       | 9.69              | 0.53‰                         | 153                      | --                                    |
| USGS 065                         | 4/15/08         | 500 <sup>5</sup>      | 92.4              | 0.25‰                         | 152                      | 8.6 <sup>5</sup>                      |

|                                  |         |                  |        |       |     |                   |
|----------------------------------|---------|------------------|--------|-------|-----|-------------------|
| " (duplicate)                    |         |                  | 98.4   | 0.34‰ |     |                   |
| " (duplicate)                    |         |                  | 100.86 | 0.32‰ |     |                   |
| USGS 076                         | 4/28/08 | 16 <sup>5</sup>  | 12.4   | 0.65‰ | 219 | 8.8 <sup>5</sup>  |
| " (duplicate)                    |         |                  | 11.43  | 0.51‰ |     |                   |
| USGS 079                         | 4/24/08 | 11 <sup>5</sup>  | 5.05   | 1.14‰ | 214 | 10.0 <sup>5</sup> |
| USGS 082                         | 4/18/08 | 1 <sup>5</sup>   | 3.80   | 1.92‰ | 211 | 9.5 <sup>5</sup>  |
| " (duplicate)                    |         |                  | 3.63   | 1.87‰ |     |                   |
| USGS 103, zone 1                 | 8/19/08 | --               | 6.30   | 0.87‰ | 387 | 9.96 <sup>4</sup> |
| USGS 103, zone 2                 | 8/18/08 | --               | 6.46   | 0.90‰ | 372 | 10.2 <sup>4</sup> |
| USGS 103, zone 3                 | 8/18/08 | --               | 6.50   | 0.86‰ | 334 | 9.21 <sup>4</sup> |
| USGS 103, zone 4                 | 8/18/08 | --               | 6.79   | 0.81‰ | 305 | 8.90 <sup>4</sup> |
| USGS 103, zone 5                 | 8/19/08 | --               | 6.26   | 0.93‰ | 278 | 10.8 <sup>4</sup> |
| USGS 103, zone 6                 | 8/19/08 | --               | 5.70   | 1.08‰ | 245 | 12.4 <sup>4</sup> |
| " (duplicate)                    |         |                  | 5.54   | 1.18‰ |     |                   |
| USGS 103, zone 7                 | 8/20/08 | --               | 0.60   | 1.84‰ | 208 | 5.47 <sup>4</sup> |
| USGS 109                         | 4/28/08 | 4 <sup>5</sup>   | 5.15   | 1.61‰ | 244 | 7.8 <sup>5</sup>  |
| " (duplicate)                    |         |                  | 5.05   | 1.61‰ |     |                   |
| USGS 111                         | 4/9/08  | 3 <sup>5</sup>   | 29.6   | 1.14‰ | 171 | 10.3 <sup>5</sup> |
| " (duplicate)                    |         |                  | 29.6   | 1.15‰ |     |                   |
| USGS 113                         | 4/23/08 | 5 <sup>5</sup>   | 10.0   | 0.67‰ | 172 | 9.5 <sup>5</sup>  |
| USGS 116                         | 4/8/08  | 8 <sup>5</sup>   | 6.54   | 1.44‰ | 174 | 9.5 <sup>5</sup>  |
| USGS 121                         | 4/24/08 | 7 <sup>5</sup>   | 4.61   | 0.79‰ | 145 | --                |
| USGS 127                         | 4/7/08  | --               | 11.3   | 1.30‰ | 182 | 11.9 <sup>5</sup> |
| USGS 131                         | 4/21/08 | --               | 12.3   | 0.65‰ | 243 | --                |
| USGS 132, zone 1                 | 8/12/08 | --               | 8.20   | 0.59‰ | 357 | 9.49 <sup>4</sup> |
| USGS 132, zone 2                 | 8/12/08 | --               | 7.61   | 0.52‰ | 308 | 8.89 <sup>4</sup> |
| USGS 132, zone 3                 | 8/13/08 | --               | 8.56   | 0.53‰ | 280 | 10.2 <sup>4</sup> |
| USGS 132, zone 4                 | 8/13/08 | --               | 8.70   | 0.52‰ | 252 | 9.28 <sup>4</sup> |
| USGS 132, zone 5                 | 8/13/08 | --               | 8.64   | 0.66‰ | 233 | 8.38 <sup>4</sup> |
| USGS 132, zone 6                 | 8/14/08 | --               | 17.4   | 1.79‰ | 194 | 6.94 <sup>4</sup> |
| <b><i>Perched Water Zone</i></b> |         |                  |        |       |     |                   |
| PW 8                             | 4/14/08 | 30 <sup>5</sup>  | 3.34   | 2.87‰ | 52  | --                |
| " (duplicate)                    |         |                  | 3.01   | 2.95‰ |     |                   |
| PW 9                             | 10/6/08 | 260 <sup>5</sup> | 12.4   | 1.26‰ | 61  | 4.5 <sup>5</sup>  |
| USGS 053 (archived) <sup>2</sup> | 1967    | 630 <sup>6</sup> | 510    | 0.18‰ | 27  | --                |
| USGS 054                         | 10/4/07 | 727 <sup>5</sup> | 6.11   | 0.76‰ | 28  | --                |
| USGS 054 (archived) <sup>2</sup> | 1967    |                  | 530    | 0.38‰ |     |                   |
| USGS 055                         | 4/15/08 | 230 <sup>5</sup> | 17.0   | 0.51‰ | 25  | --                |
| " (duplicate)                    |         |                  | 16.0   | 0.60‰ |     |                   |
| USGS 055 (archived) <sup>2</sup> | 1967    |                  | 270    | 1.13‰ |     |                   |
| USGS 072                         | 4/22/08 | 2 <sup>3</sup>   | 0.48   | 1.44‰ | 61  | --                |
| USGS 073                         | 10/7/08 | 237 <sup>5</sup> | 37.8   | 0.69‰ | 39  | 8.4 <sup>5</sup>  |

--" data unavailable; <sup>1</sup>Outlier (see text); <sup>2</sup>Archived samples from 1967; <sup>3</sup>Data from Liszewski and Mann (5); <sup>4</sup>Data from Bartholomay and Twining (1); <sup>5</sup>Data from NWIS database (6); <sup>6</sup>Data from Bartholomay (7)

## References for Supporting Information

- (1) Bartholomay, R. C.; Twining, B. V. *Chemical constituents in groundwater from multiple zones in the snake river plain aquifer at the Idaho national laboratory, Idaho, 2005–08*, Scientific Investigations Report 2010–5116, U. S. Geological Survey: Reston, VA, 2010.
- (2) Ellis, A.S.; Johnson, T.M.; Bullen, T.D. Chromium isotopes and the fate of hexavalent chromium in the environment. *Science* **2002**, 295, 2060-2062.
- (3) Schoenberg, R.; Zink, S.; Staubwasser, M.; von Blanckenburg, F. The stable Cr isotope inventory of solid Earth reservoirs determined by double spike MC-ICP-MS. *Chem. Geol.* **2008**, 249, 294-306.
- (4) Faure, G.; Mensing, T.M. *Isotopes: Principles and Applications*; John Wiley & Sons, Inc.: Hoboken, NJ, 2005.
- (5) Liszewski, M.J.; Mann, L.J. *Concentration of 23 trace elements in ground water and surface water at and near the Idaho National Engineering Laboratory, Idaho, 1988-91*. Open-File Report 93-126, U. S. Geological Survey: Reston, VA, 1993.
- (6) U.S. Geological Survey National Water Information System: Web Interface. Available at <http://nwis.waterdata.usgs.gov/usa/nwis/qwdata>.
- (7) Bartholomay, R.C. *Distribution of selected radiochemical and chemical constituents in perched ground water, Idaho National Engineering Laboratory, Idaho, 1992-95*. Water-Resources Investigations report 98-4026, U. S. Geological Survey, Reston, VA, 1998.
